# Supplementary material
Source: PubMed Central journal article supplement (PMC6701184)
Supplement: NIHMS1045819-supplement-1.pdf [file NIHMS1045819-supplement-1.pdf]

## Appendix:

**Supplementary table 1: Summary outcomes for patients in discovery (COMPARZ) and validation cohort (RECORD3) - biomarker and full populations**

| Outcomes                      | COMPARZ biomarker cohort<br>n=377* |                     | COMPARZ total<br>n=927 |                      | RECORD3 biomarker cohort<br>n=258*                               |                                                                  | RECORD3 total<br>n=471                                           |                                                                  |
|-------------------------------|------------------------------------|---------------------|------------------------|----------------------|------------------------------------------------------------------|------------------------------------------------------------------|------------------------------------------------------------------|------------------------------------------------------------------|
| Combined treatment arms       |                                    |                     |                        |                      |                                                                  |                                                                  |                                                                  |                                                                  |
| Median PFS in months (95% CI) | 9.1 (8.3, 11.0)                    |                     | 8.6 (8.3, 10.9)        |                      | 9.8 (8.1, 10.9)                                                  |                                                                  | 8.2 (8.0, 10.1)                                                  |                                                                  |
| Median OS in months (95% CI)  | 28.2 (26.2, 34.9)                  |                     | 28.7 (26.6, 32.4)      |                      | 29.9 (22.4, 33.4)                                                |                                                                  | 27.7 (21.9, 31.4)                                                |                                                                  |
| Treatment arms                | Sunitinib<br>n=189                 | Pazopanib<br>n=188  | Sunitinib<br>n=463     | Pazopanib<br>n=464   | 1 <sup>st</sup> line<br>Sunitinib<br>then<br>Everolimus<br>n=130 | 1 <sup>st</sup> line<br>Everolimus<br>then<br>Sunitinib<br>n=128 | 1 <sup>st</sup> line<br>Sunitinib<br>then<br>Everolimus<br>n=233 | 1 <sup>st</sup> line<br>Everolimus<br>then<br>Sunitinib<br>n=238 |
| Median PFS in months (95% CI) | 9.0<br>(8.1, 11.2)                 | 10.7<br>(8.3, 11.1) | 9.3<br>(8.2, 11.0)     | 8.6<br>(8.3, 11.0)   | 10.9<br>(8.1, 13.3)                                              | 8.1<br>(5.4, 10.5)                                               | 10.7<br>(8.2, 11.5)                                              | 7.9<br>(5.6, 8.2)                                                |
| Median OS in months (95% CI)  | 27.4<br>(21.0, 31.5)               | 32.6<br>(26.7, NE)  | 29.1<br>(24.7, 32.1)   | 28.4<br>(26.0, 35.6) | 31.4<br>(23.1, 34.9)                                             | 26.9<br>(16.9, 34.7)                                             | 29.5<br>(22.8, 33.1)                                             | 22.4<br>(18.6, 33.3)                                             |

CR, complete response; mPFS, median progression free survival; mOS, median overall survival; NE, not estimable; PD, progressive disease; PR, partial response; SD, stable disease.

\* Biomarker cohort is all the patients from ITT population that have available NGS data.

**Supplementary table 2: Multivariate Cox regression model testing clinical, laboratory and genomic parameters for OS in the discovery cohort (COMPARZ)**

| Parameter [reference level]           | Effect size | Two-sided p-value | HR    | 95% HR Confidence Limits |       |
|---------------------------------------|-------------|-------------------|-------|--------------------------|-------|
| <i>TP53+BAP1</i> [Continuous 0, 1, 2] | 0.45072     | 0.0008            | 1.569 | 1.207                    | 2.042 |
| <i>PBRM1</i> _status [MT]             | 0.45472     | 0.0035            | 1.576 | 1.161                    | 2.138 |
| KPS [ $\geq 80\%$ ]                   | 0.40704     | 0.0204            | 1.502 | 1.065                    | 2.119 |
| Hgb [High]                            | 0.15662     | 0.3326            | 1.170 | 0.852                    | 1.606 |
| LDH [ $\leq 1.5$ ULN]                 | 0.51181     | 0.0769            | 1.668 | 0.946                    | 2.941 |
| Time from diagnosis [ $\geq 1$ y]     | 0.37766     | 0.0192            | 1.459 | 1.064                    | 2.001 |
| Corrected Ca [ $\leq 10$ mg/DL]       | 0.73286     | 0.0002            | 2.081 | 1.416                    | 3.059 |

Ca, calcium; HR=hazard ratio; Hgb, haemoglobin; LDH, lactate dehydrogenase; KPS, karnofsky performance status; MT=mutated  
Listed are individual parameters considered favourable per the original model/univariate testing, used as reference level for the hazard ratio estimate of each variable in the multivariate Cox PH model.

**Supplementary table 3: Distribution of risk groups in the discovery cohort (COMPARZ), per original and annotated MSKCC risk models**

| MSKCC original risk                   | MSKCC annotated risk by adding TP53, BAP1 and PBRM1<br>(n=357) |                                |                                        |                                 |                |
|---------------------------------------|----------------------------------------------------------------|--------------------------------|----------------------------------------|---------------------------------|----------------|
|                                       | Favourable<br>(annotated=0)<br>n (%)                           | Good<br>(annotated=1)<br>n (%) | Intermediate<br>(annotated=2)<br>n (%) | Poor<br>(annotated ≥3)<br>n (%) | Total<br>n (%) |
| Favourable<br>(original=0), n (%)     | 36 (10.08)                                                     | 37 (10.36)                     | 14 (3.92)                              | 0                               | 87 (24.37)     |
| Intermediate<br>(original=1-2), n (%) | 0                                                              | 40 (11.2)                      | 94 (26.33)                             | 83 (23.25)                      | 217 (60.78)    |
| Poor<br>(original ≥3), n (%)          | 0                                                              | 0                              | 0                                      | 53 (14.85)                      | 53 (14.85)     |
| Total, n (%)                          | 36 (10.08)                                                     | 77 (21.57)                     | 108 (30.25)                            | 136 (38.1)                      | 357 (100)      |

MSKCC=Memorial Sloan Kettering Cancer Center

**Supplementary table 4: The p-value of Hosmer-Lemeshow overall goodness of fit test**

| <b>Model</b>                  | <b>p-value of Hosmer-Lemeshow test</b> |
|-------------------------------|----------------------------------------|
| COMPARZ MSKCC original model  | 0.0662                                 |
| COMPARZ MSKCC annotated model | 0.1702                                 |
| RECORD3 MSKCC original model  | 0.4706                                 |
| RECORD3 MSKCC annotated model | 0.4319                                 |

No model test has significant p-value, which means no model has poor fit in the assessment of calibration.

**Supplementary table 5: OS and PFS outcomes by original and annotated MSKCC risk groups in the discovery cohort (COMPARZ)**

| <b>Original Group</b>                 | <b>Median OS<br/>(95% CI)</b> | <b>25<sup>th</sup> quartile OS<br/>(95% CI)</b> | <b>Median PFS<br/>(95% CI)</b> | <b>25<sup>th</sup> quartile PFS<br/>(95% CI)</b> |
|---------------------------------------|-------------------------------|-------------------------------------------------|--------------------------------|--------------------------------------------------|
| Favourable Risk<br>n=87               | NE<br>(30.55, NE)             | 26.15<br>(18.69, 28.71)                         | 11.10<br>(8.38, 16.59)         | 8.21<br>(5.39, 8.38)                             |
| Intermediate Risk<br>n=217            | 26.64<br>(21.03, 32.03)       | 11.61<br>(9.53, 13.27)                          | 8.54<br>(8.15, 10.97)          | 2.86<br>(2.63, 4.17)                             |
| Poor Risk<br>n=53                     | 18.10<br>(11.86, 25.20)       | 10.25<br>(4.21, 12.65)                          | 5.39<br>(2.86, 10.55)          | 2.60<br>(1.38, 3.12)                             |
| <b>Changing Group</b>                 | <b>Median OS<br/>(95% CI)</b> | <b>25<sup>th</sup> quartile OS (95% CI)</b>     | <b>Median PFS<br/>(95% CI)</b> | <b>25<sup>th</sup> quartile<br/>PFS (95% CI)</b> |
| Fav (original) to Fav (annotated)     | NE<br>(31.61, NE)             | 28.02<br>(26.15, NE)                            | 16.59<br>(11.04, 26.25)        | 11.01<br>(8.12, 11.10)                           |
| Fav (original) to Good (annotated)    | NE<br>(34.89, NE)             | 26.05<br>(13.08, NE)                            | 8.38<br>(5.65, 15.05)          | 5.49<br>(2.07, 8.31)                             |
| Fav (original) to Inter (annotated)   | 22.95<br>(11.24, 30.56)       | 17.35<br>(10.02, 22.34)                         | 5.52<br>(3.84, NE)             | 4.37<br>(1.35, 5.52)                             |
| Inter (original) to Good (annotated)  | 35.48<br>(21.55, NE)          | 19.75<br>(13.17, 23.10)                         | 8.97<br>(7.72, 22.05)          | 5.49<br>(1.54, 8.28)                             |
| Inter (original) to Inter (annotated) | 32.03<br>(24.15, NE)          | 12.52<br>(9.53, 18.23)                          | 10.97<br>(8.28, 13.77)         | 4.04<br>(2.69, 7.89)                             |
| Inter (original) to Poor (annotated)  | 16.46<br>(12.75, 23.79)       | 8.77<br>(6.90, 11.53)                           | 5.59<br>(4.04, 10.02)          | 2.56<br>(1.41, 2.83)                             |
| Poor (original) to Poor (annotated)   | 18.10<br>(11.86, 25.20)       | 10.25<br>(4.21, 12.65)                          | 5.39<br>(2.86, 10.55)          | 2.60<br>(1.38, 3.12)                             |

Fav, favourable; Inter, intermediate, mOS, median overall survival; mPFS, median progression free survival; NE, not estimable.

**Supplementary table 6: RECORD3 distribution and outcome for good/intermediate/poor for MSKCC and MSKCC 2·0**

| MSKCC risk          | MSKCC original model |                       | MSKCC annotated with <i>BAP1</i> , <i>TP53</i> , <i>PBRM1</i> mutation status |                       |
|---------------------|----------------------|-----------------------|-------------------------------------------------------------------------------|-----------------------|
|                     | n (%)                | mOS (95% CI) [months] | n (%)                                                                         | mOS (95% CI) [months] |
| Favourable          | 82 (32)              | 45 (36-NE)            | 28 (11)                                                                       | 45 (34-NE)            |
| Good                |                      |                       | 81 (31)                                                                       | 36 (33-46)            |
| Intermediate        | 145 (56)             | 23 (19-31)            | 66 (26)                                                                       | 32 (20-40)            |
| Poor                | 31 (12)              | 8 (4-12)              | 83 (32)                                                                       | 11 (9-16)             |
| p-value             | <0·0001              |                       | <0·0001                                                                       |                       |
| C-index OS (95% CI) | 0·658 (0·616-0·699)  |                       | 0·670 (0·625-0·715)                                                           |                       |

mOS, median overall survival; MSKCC, Memorial Sloan Kettering Cancer Center; NE, not estimable.

**Supplementary Table 7: OS by original and annotated MSKCC risk groups for validation cohort (RECORD3)**

| <b>Original grouping</b>              | <b>Median OS<br/>(95% CI)</b> | <b>25<sup>th</sup> quartile OS<br/>(95% CI)</b> |
|---------------------------------------|-------------------------------|-------------------------------------------------|
| Favourable<br>n=82                    | 45.04<br>(36.30, NE)          | 28.29<br>(17.22, 34.69)                         |
| Intermediate<br>n=145                 | 23.06<br>(19.19, 31.44)       | 10.87<br>(7.75, 14.00)                          |
| Poor<br>n=31                          | 8.08<br>(3.84, 11.47)         | 3.45<br>(1.71, 7.03)                            |
| <b>Changing Group</b>                 | <b>Median OS<br/>(95% CI)</b> | <b>25<sup>th</sup> quartile OS<br/>(95% CI)</b> |
| Inter (original) to Good (Annotated)  | 34.86<br>(27.66, 46.13)       | 20.53<br>(10.58, 30.19)                         |
| Inter (original) to Inter (Annotated) | 27.70<br>(17.71, 37.19)       | 11.30<br>(5.49, 17.71)                          |
| Inter (original) to Poor (Annotated)  | 16.89<br>(9.76, 20.44)        | 7.33<br>(5.65, 9.76)                            |

CI=confidence interval; Inter, intermediate, mOS=median overall survival; MSKCC=Memorial Sloan Kettering Cancer Center; NE, not estimable.

**Supplementary table 8: Objective response by risk category and trend-testing from validation cohort (RECORD3)**

| <b>MSKCC Risk</b> | <b>Original MSKCC risk model - RECORD3</b> | <b>New MSKCC risk model 2 - RECORD3</b> |
|-------------------|--------------------------------------------|-----------------------------------------|
| Risk status       | ORR                                        | ORR                                     |
| Favourable risk   | 24 (31.6)                                  | 14 (51.9)                               |
| Good              |                                            | 18 (24.0)                               |
| Intermediate risk | 25 (18.7)                                  | 14 (23.7)                               |
| Poor risk         | 1 (3.9)                                    | 4 (5.3)                                 |
| Total             | 50 (21.2)                                  | 50 (21.2)                               |
| CA one-sided p    | 0.0007                                     | <0.0001                                 |

MSKCC, Memorial Sloan Kettering Cancer Center; ORR, overall response rate.



Supplementary Figure 1:

Panel A) Oncoprint: Original MSKCC risk model Panel B) Oncoprint: Annotated MSKCC risk model

A

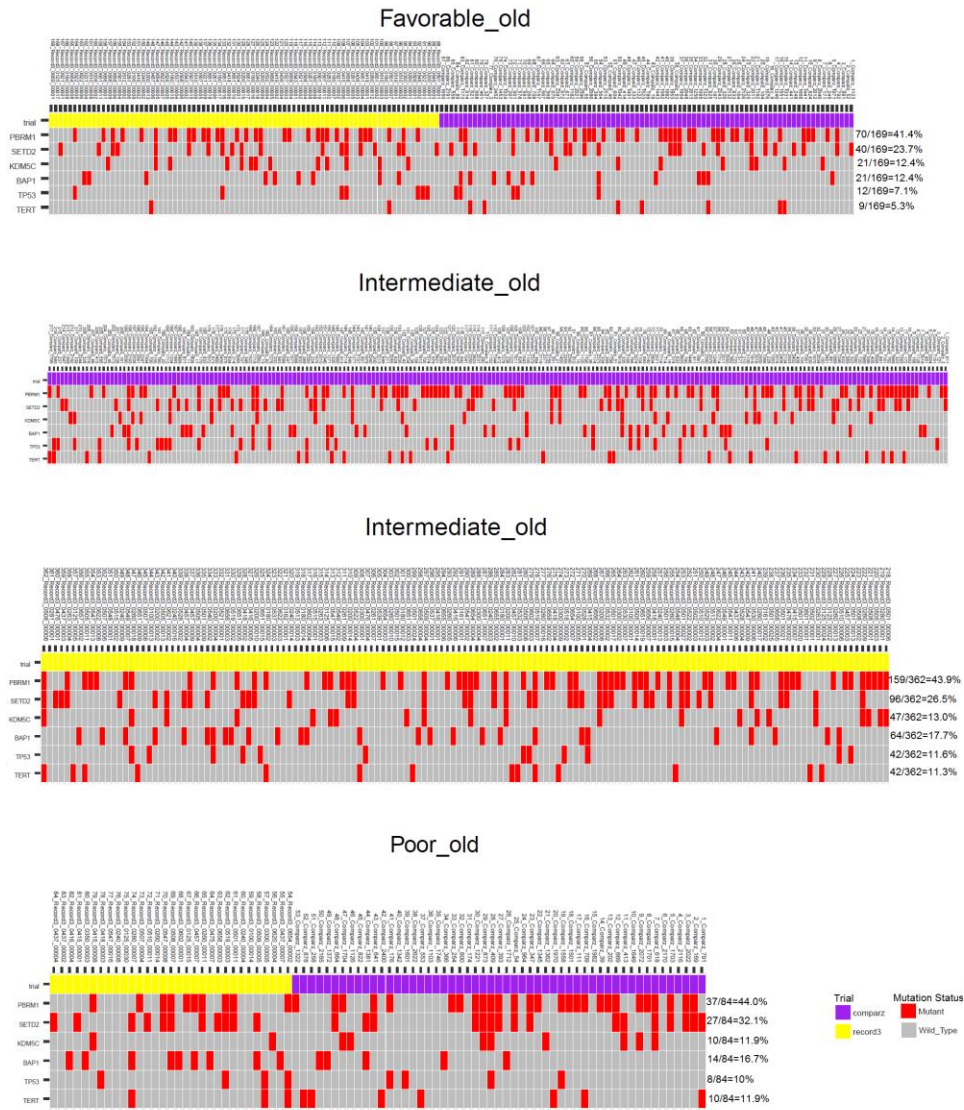

B

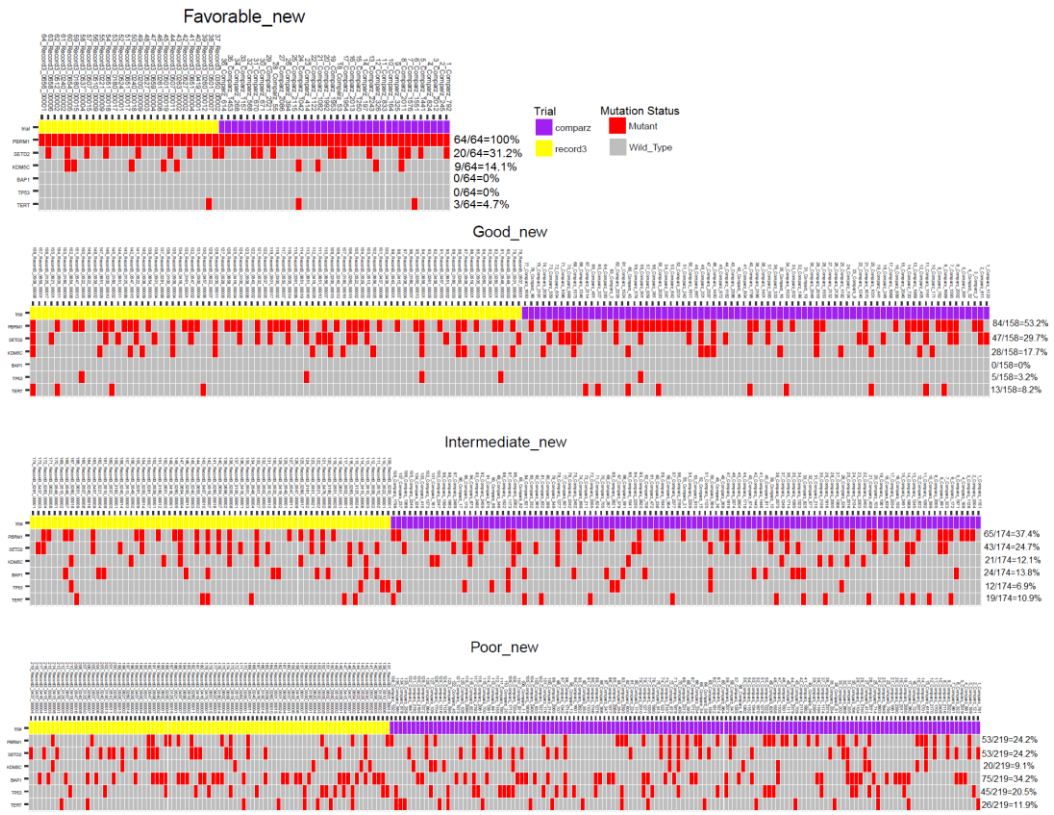

**Supplementary Figure 2: Overall survival by mutation status in the discovery cohort (COMPARZ)**

**Panel A) Kaplan-Meier plot of OS by BAP1 and TP53 mutation status. Panel B) Kaplan-Meier plot of OS by PBRM1 mutation status and comutant BAP1 or TP53 mutation status.**

Legend: A) The KM plot for the three category groupings of *BAP1/TP53* are presented including, *BAP1* and *TP53* are both wild type (0); *BAP1* or *TP53* is mutated (1); *BAP1* and *TP53* are both mutated (2). Adding a point for poorer prognosis if one or both of *BAP1/TP53* are mutated was considered based on this plot.  
 B) The KM plot of OS by *PBRM1* status and *BAP1/TP53* joint status  
 MSKCC, Memorial Sloan Kettering Cancer Center

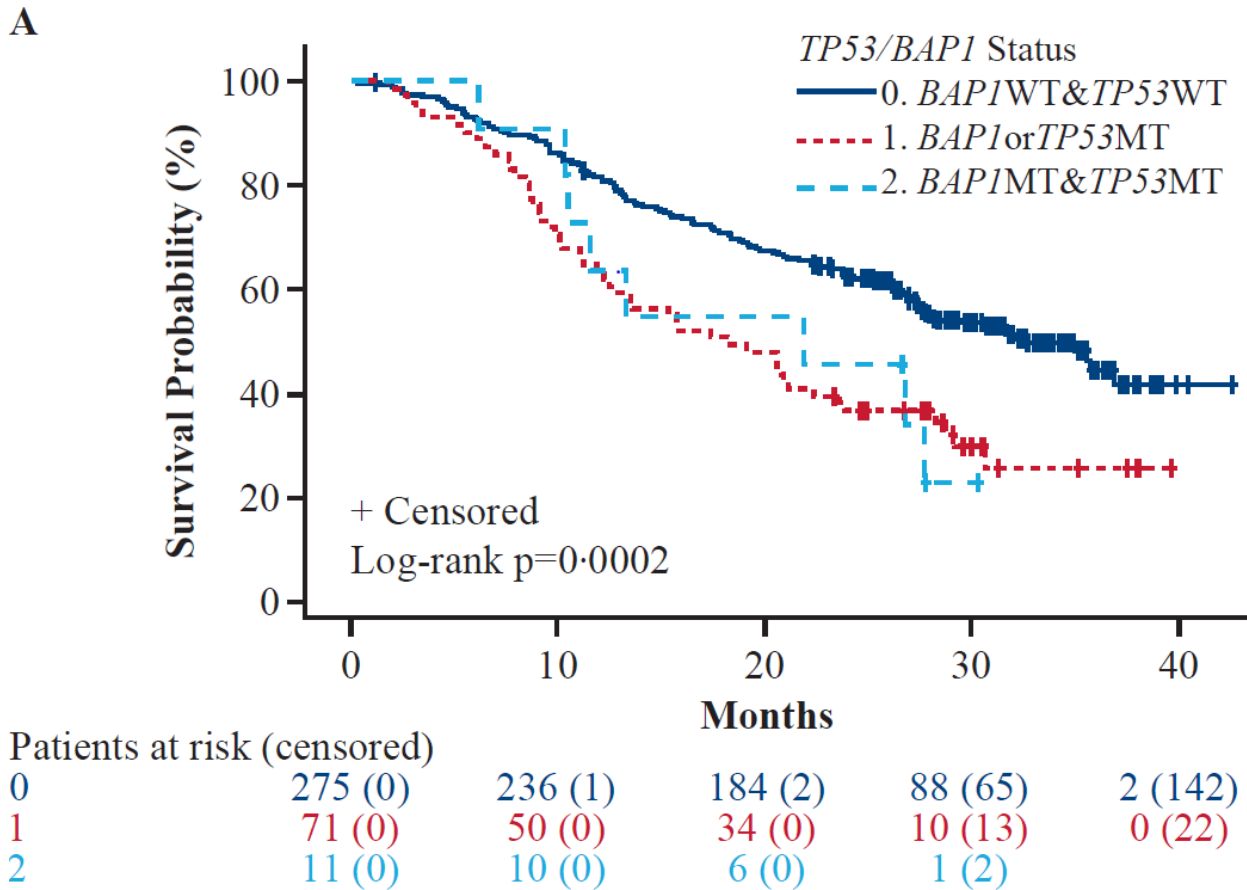

**B**

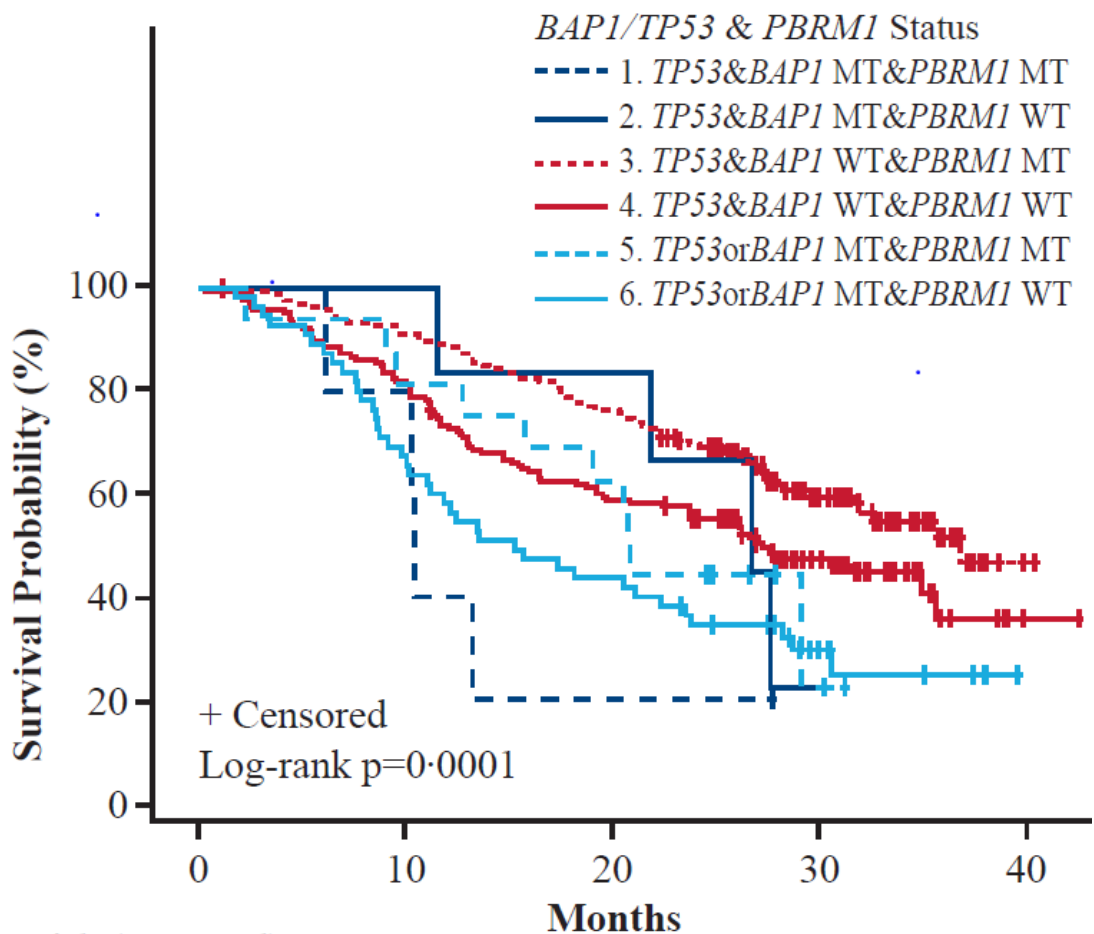

Patients at risk (censored)

|   |         |         |         |         |        |
|---|---------|---------|---------|---------|--------|
| 1 | 5 (0)   | 4 (0)   | 1 (0)   | 0 (1)   |        |
| 2 | 6 (0)   | 6 (0)   | 5 (0)   | 1 (1)   |        |
| 3 | 139 (0) | 125 (1) | 105 (1) | 50 (36) | 1 (80) |
| 4 | 136 (0) | 111 (0) | 79 (1)  | 38 (29) | 1 (62) |
| 5 | 16 (0)  | 13 (0)  | 10 (0)  | 1 (5)   | 0 (6)  |
| 6 | 55 (0)  | 37 (0)  | 24 (0)  | 9 (8)   | 0 (16) |

**Supplementary Figure 3: Kaplan-Meier plot of overall survival by MSKCC annotated risk scores in the discovery cohort (COMPARZ)**

Legend: Patients were separated by individual score on the annotated model (0-6); no patient scored 7, though technically it would have been possible. MSKCC, Memorial Sloan Kettering Cancer Center

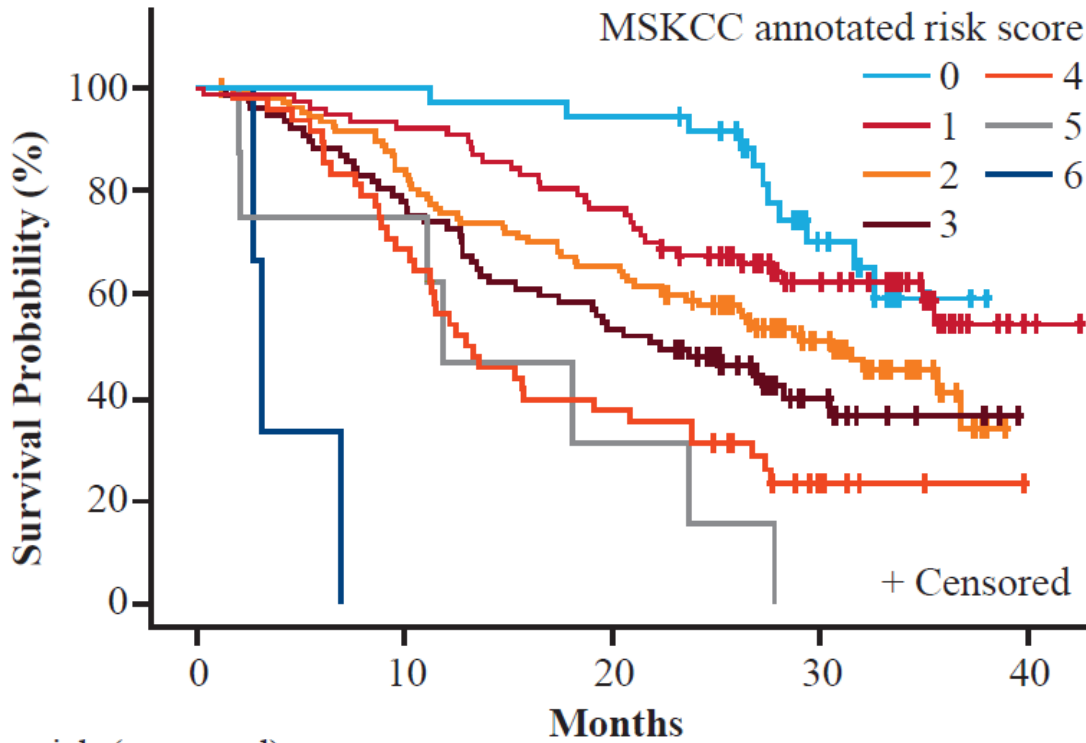

| Patients at risk (censored) | Months  |        |        |         |        |
|-----------------------------|---------|--------|--------|---------|--------|
|                             | 0       | 10     | 20     | 30      | 40     |
| 0                           | 36 (0)  | 36 (0) | 34 (0) | 16 (11) | 0 (25) |
| 1                           | 77 (0)  | 71 (0) | 59 (0) | 30 (19) | 2 (45) |
| 2                           | 108 (0) | 90 (1) | 70 (1) | 35 (22) | 0 (52) |
| 3                           | 77 (0)  | 60 (0) | 41 (0) | 13 (20) | 0 (32) |
| 4                           | 48 (0)  | 33 (0) | 18 (0) | 5 (7)   | 0 (12) |
| 5                           | 8 (0)   | 6 (0)  | 2 (1)  | 0 (1)   |        |
| 6                           | 3 (0)   | 0 (0)  |        |         |        |

**Supplementary Figure 4: Kaplan-Meier plot of overall survival comparing original and new MSKCC risk models in validation cohort (RECORD3)**

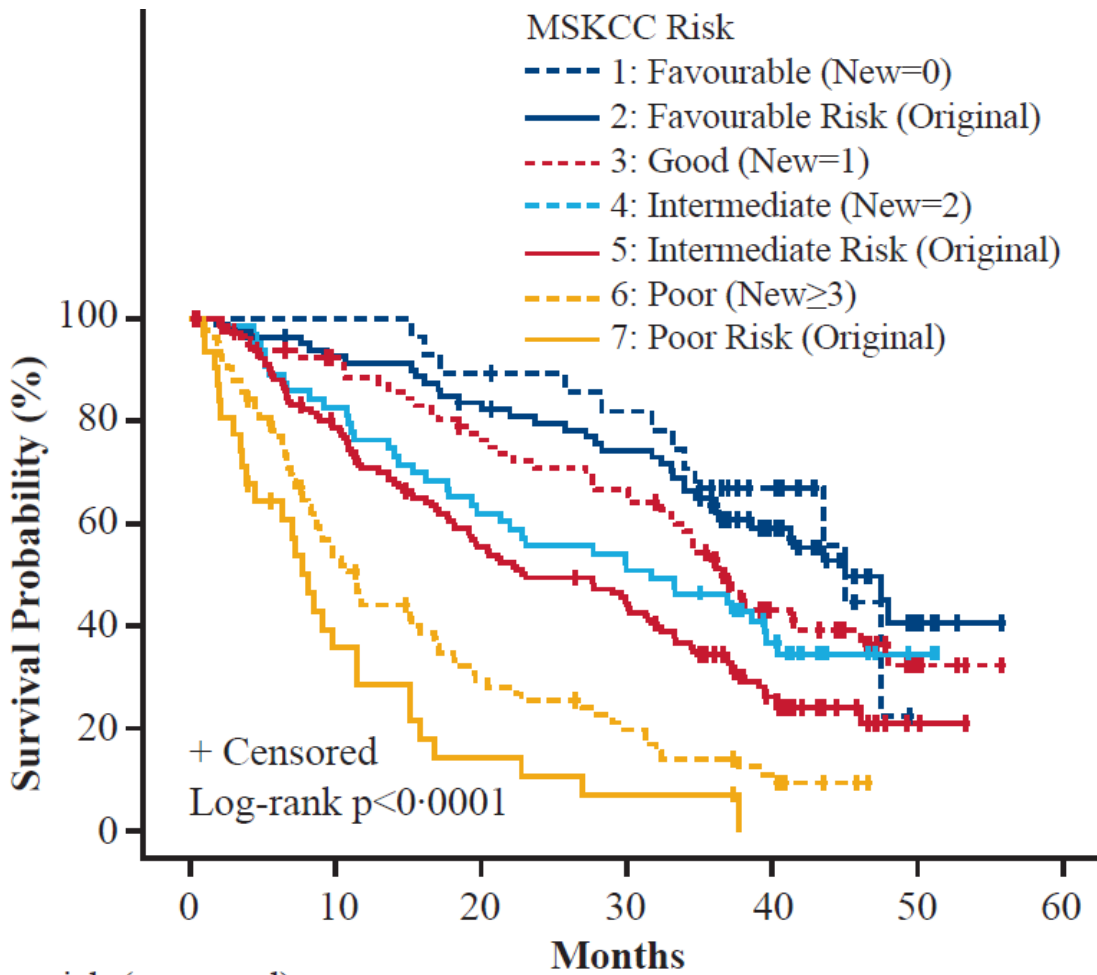

Patients at risk (censored)

|   |         |         |        |        |         |        |        |
|---|---------|---------|--------|--------|---------|--------|--------|
| 1 | 28 (0)  | 28 (0)  | 25 (0) | 22 (1) | 12 (7)  | 0 (16) |        |
| 2 | 82 (0)  | 72 (4)  | 64 (5) | 56 (6) | 33 (18) | 5 (40) | 0 (45) |
| 3 | 81 (0)  | 69 (6)  | 57 (7) | 49 (7) | 22 (18) | 5 (31) | 0 (36) |
| 4 | 66 (0)  | 52 (3)  | 39 (3) | 32 (3) | 18 (9)  | 2 (24) | 0 (26) |
| 5 | 145 (0) | 109 (6) | 75 (8) | 59 (9) | 26 (20) | 2 (41) | 0 (43) |
| 6 | 83 (0)  | 42 (3)  | 22 (5) | 14 (6) | 7 (7)   | 0 (13) |        |
| 7 | 31 (0)  | 10 (2)  | 4 (2)  | 2 (2)  | 0 (3)   |        |        |

MSKCC, Memorial Sloan Kettering Cancer Center

**Supplementary Figure 5: Kaplan-Meier plot of overall survival for original MSKCC risk score in the discovery cohort (COMPARZ)**

Legend: Patients were separated by individual score on the annotated model (0-4); no patient scored 5, though technically it would have been possible. MSKCC, Memorial Sloan Kettering Cancer Center

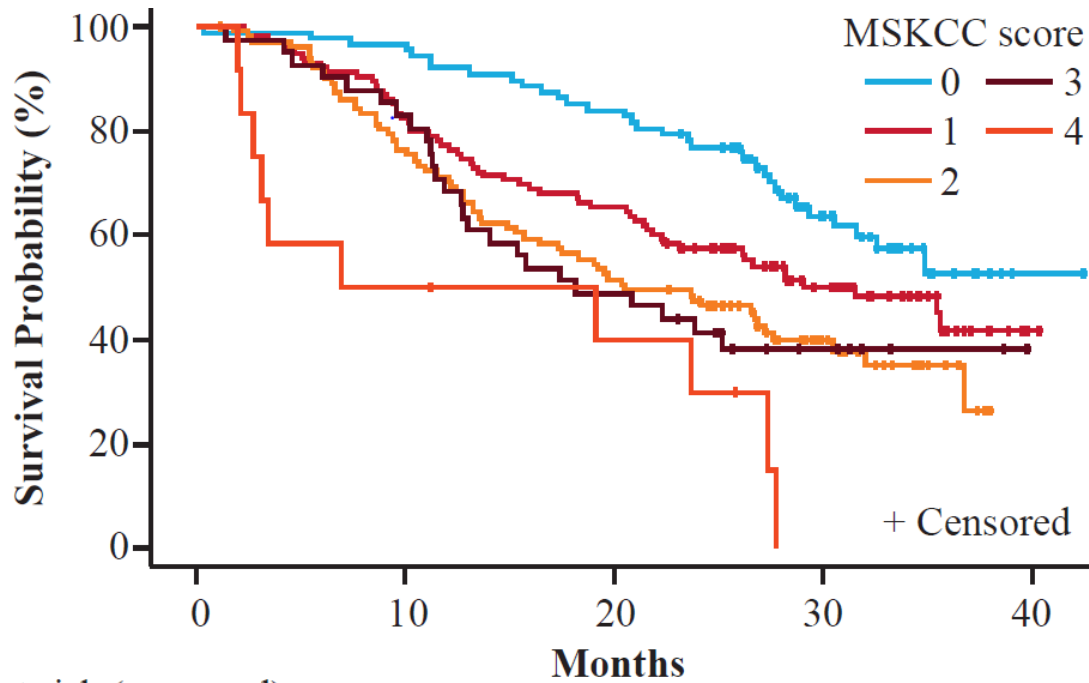

| Patients at risk (censored) |         | Months |        |         |        |  |
|-----------------------------|---------|--------|--------|---------|--------|--|
|                             | 0       | 10     | 20     | 30      | 40     |  |
| 0                           | 87 (0)  | 84 (0) | 73 (0) | 36 (22) | 1 (53) |  |
| 1                           | 115 (0) | 95 (0) | 75 (0) | 35 (25) | 1 (56) |  |
| 2                           | 102 (0) | 77 (1) | 52 (1) | 19 (24) | 0 (40) |  |
| 3                           | 41 (0)  | 34 (0) | 20 (0) | 9 (7)   | 0 (16) |  |
| 4                           | 12 (0)  | 6 (0)  | 4 (1)  | 0 (2)   |        |  |
